# Supplementary material
Source: publisher figshare collection journal article supplement (https://tandf.figshare.com/articles/dataset/_/12849356)
Supplement: Supplementary file 1 [file 24407846]

## SUPPLEMENTARY MATERIAL

### ***Gymnocarpus decandrus* Forssk: A new promising drug for diabetes management**

Seham S. El-Hawary<sup>1#</sup>, Mahmoud M. Mubarek<sup>2#</sup>, Rehab A. Lotfy<sup>2</sup>, Ahmed R. Hassan<sup>2</sup>, Mansour Sobeh<sup>3</sup> and Mona M. Okba<sup>1\*</sup>

<sup>1</sup> Department of Pharmacognosy, Faculty of Pharmacy, Cairo University Kasr El-Ainy, Cairo, 11562

<sup>2</sup> Department of Medicinal and Aromatic plants, Desert Research Center, 11753 Matariya, Cairo. Egypt.

<sup>3</sup> AgroBioSciences Research Division, Mohammed VI Polytechnic University, Lot 660–Hay MoulayRachid, 43150 Ben-Guerir, Morocco

\*Corresponding author: [monamoradokba@gmail.com](mailto:monamoradokba@gmail.com)

#Authors with same contribution

#### **Abstract:**

*Gymnocarpus decandrus* Forssk. is a well-known grazing wild plant. This study targets scientific validation of its claimed antidiabetic activity and exploring its bioactive metabolites. Chromatographic purification of *G. decandrus* ethanol extract (GDEE) allowed isolation of vitexin (C1), protocatechuic acid (C2) and quercetin (C3). HPLC-PDA-MS/MS enabled identification of nineteen metabolites; 13 flavonoids, 5 saponins, and 1 phenolic acid in *G. decandrus* and four in the genus *Gymnocarpus* for the first time. The antidiabetic potential was evaluated *via* testing the *Coxsackie B4* virus and  $\alpha$ -glucosidase inhibitory potentials. C3 exhibited its potent antiviral activity through blocking of the virus attachment (96.28%, SI 4.41) and virus inactivation before adsorption (91.47%, SI 4.78). GDEE and C1-C3 showed dose dependent  $\alpha$ -glucosidase inhibitory activity with IC<sub>50</sub> of 733.9, 293.3, 118.1 and 69.1  $\mu$ g/mL respectively. Our study represents the sole complete map for *G. decandrus* secondary metabolites and presents it as promising drug for diabetes management.

**Key words:** *Gymnocarpus decandrus*, Caryophyllaceae, *Coxsackie B4* virus,  $\alpha$ -Glucosidase enzyme, flavonoids, HPLC- PDA-MS/MS.

## **Experimental:**

### ***Plant material***

Flowering aerial parts of *G. decandrus* Forssk. were collected during the flowering stage from the western Mediterranean coastal region (Alexandria- Mersa Matrooh road 80- 140 km.) during April, 2018. The plant was identified by Prof. Dr. Azza El Hadidy, Professor of Taxonomy and Flora- Herbarium, Faculty of Science, Cairo University. Voucher specimen of the plant under investigation was deposited with code no. (7.12.15.1) at the Herbarium of Pharmacognosy Department, Faculty of Pharmacy, Cairo University.

### ***General***

General UV lamp (Spectroline Model CM-10, New York, USA) was used for location of fluorescent spots. UV spectra were determined in methanol and after addition of different reagents on a Hewlett Packard 8452A diode array spectrophotometer in the region of 200-500 nm. <sup>1</sup>H-NMR (400 MHz) and <sup>13</sup>C-NMR (75 MHz) were measured on Varian MercuryVX-300 NMR spectrophotometer. NMR spectra were recorded in CD<sub>3</sub>OD, DMSO-d<sub>6</sub> and chemical shifts were given in  $\delta$  (ppm) relative to TMS as internal standard. For column chromatography (Scazzocchio *et al.*, 2011), Sephadex LH-20 (Pharmacia, Uppsala, Sweden), silica gel 60 (Fluka, 70-230 mesh ASTM, Germany) were used. Thin-layer chromatography (TLC) was performed on silica gel GF254 precoated plates (Fluka, Germany). TLC plates were visualized under visible and UV light before and after exposure to ammonia vapor. *Para*-anisaldehyde sulfuric acid and aluminum chloride spray reagents were used. Standards for co-TLC: several flavonoids and phenolic acids were obtained from Fluka, Sigma, Germany.

### ***Extraction and isolation of the major phenolics***

Air dried flowering aerial parts of *G. decandrus* Forssk. (1.5 kg) was powdered then extracted by maceration in ethanol (70 %) and filtered off. The combined *G.*

*decandrus* ethanol extract (Sharma *et al.*, 2016) was concentrated under reduced pressure at temperature not exceeding 50 °C till dryness. The dry extract (80 g) was subjected to fractionation by solvents of increasing polarities, concentrated and dried, to yield 12.2 g, 2.1 g, 4.95 g and 22 g of *n*-hexane, methylene chloride, ethyl acetate and remaining aqueous fractions respectively.

The ethyl acetate fraction was fractionated on polyamide column and eluted with gradient elution of water and ethanol. Fractions of (500 ml each) were collected, concentrated and monitored by TLC. Similar fractions were combined together yielding two major sub-fractions A and B.

**Sub-fraction A** which was eluted using ethanol 20% and re-fractionated on sephadex LH-20 using distilled water as eluent. Further purification on preparative (TLC) using ethyl acetate: methanol: water 30:5:4 resulted in the isolation of single pure compound **C1** (35 mg), after purification on silica column (50 X 1.5 cm), using methylene chloride.

**Sub-fraction B** which was eluted using ethanol 40-50 % was then applied on sephadex LH-20 using saturated *n*-butanol as eluent yielding two fractions. ( $F_{B1}$  0.12 g &  $F_{B2}$  0.3 g) containing two compounds **C2** and **C3**, respectively with several minor spots.  $F_{B1}$  was subjected to preparative paper chromatography (PC) using system *n*- butanol: acetic acid: water (4:1:5). Further purification on sephadex LH-20 using isocratic elution with water yielded pure compound **C2** (19 mg). Compound **C3** (27 mg) was isolated from  $F_{B2}$  after applying double run descending preparative PC using acetic acid: water (15: 85).

#### **HPLC-PDA-MS/MS metabolites profiling:**

A Thermo Finnigan HPLC system using a Discovery HS F5 bonded phase column (Discovery HS F5, 15cm x 4.6mm ID, 5µm particles, 4.6 × 150 mm, 3 µm, Sigma-Aldrich, Germany) was used. Water and acetonitrile (ACN) (Sigma-Aldrich GmbH, Germany) (0.1 % formic acid each) were used as a mobile phase. At 0 min,

ACN was 5% and then increased to 30% in 60 min at 1 mL/min with a 1:1 split before the ESI source. Autosampler survey or Thermo Quest was utilized to inject GDEE and the system was controlled by Xcalibur software (Xcalibur TM 2.0.7, Thermo Fischer Scientific, Waltham, Ma, USA). Thermo Finnigan LCQ-Duo ion trap mass spectrometer (Thermo Electron Corporation, Waltham, Ma, USA) with an ESI source (Thermo Quest Corporation, Austin, Tx, USA) was used. The MS was operated in the negative mode so that the phenolics and flavonoids could be readily ionized (Okba, El Gedaily, and Ashour 2017; Ashour et al. 2019). The ions were detected in a full scan mode and mass range of 50–2000 *m/z*.

## **Biological evaluation**

### **Cytotoxicity**

The MTT colorimetric assay was performed as described (Elaiissi et al. 2012; Takeuchi, Baba, and Shigeta 1991). Cytotoxicity assessment is based on the reduction of MTT (3-[4,5-dimethylthiazol-2-yl]-2,5-diphenyl tetrazolium bromide), by mitochondrial dehydrogenase of viable cells, to give a blue formazan product measured at 540 nm. Every day the cells were examined using a phase-contrast microscope to determine the minimum concentration that caused alterations in cell morphology which is the maximum non-toxic concentration (MNTC). Optical density (OD) was measured at 540 nm using a Perkin-Elmer ELISA reader (HTS 7000 plus) (Goodger and Woodrow 2011). The cytotoxicity % was calculated as  $[(A - B)/A] \times 100$ , where A & B were the optical density of untreated and treated cells, respectively.

The sample concentration that caused 50% reduction in the cell viability ( $CC_{50}$ ) when compared to untreated controls was determined graphically. Standard graph was plotted using different concentrations of tested samples on X axis and cell viability on Y axis.

$$\text{Cell viability (\%)} = \text{Mean OD/Control OD} \times 100\%.$$

## **Antiviral activity**

### *Cell culture and virus.*

The Vero cell line (*Cercopithecus aethiops* kidney epithelial cells) was maintained as described by (Okba, El Gedaily, and Ashour 2017). *Coxsackie (CoxB4)* virus was provided by Dr. Mohammed Ali, Laboratory of virology, Science Way for scientific researches and consultations, Faculty of medicine, Al-Azhar University, Egypt.

### *Antiviral Protocols*

In order to study the mechanism of the antiviral activity of the tested samples; the virus and the Vero cell cultures were treated with the MNTC of the tested samples and their serial dilution according to the following three protocols (Gong 2013; Ocazonez et al. 2010; Gescher et al. 2011):

#### *protocol A (virus pretreatment):*

To test the virucidal activity of the tested samples this protocol was applied. Virus was exposed to the tested samples for one hr at 37°C. Then 100 µL of the mixture were added to the cells cultured fluently in 96-well flat-bottom microtiter plate.

#### *protocol B (cell pretreatment):*

This protocol was used to test the virus entry into the host cells by blocking attachment to the cell surface through incubation of the tested samples on Vero cells for one hour before the virus was added.

#### *protocol C (post infection treatment):*

This protocol was designed to test the effect of the tested samples on virus replication; incubation of the virus on Vero cells for one hour then the tested samples were added.

Evaluation of infected and non-infected cells viability was done using the absorbance values of formazan used in the MTT assay, as described previously. The 50% inhibition concentration (IC<sub>50</sub>) and the selectivity index (SI = CC<sub>50</sub>/IC<sub>50</sub>) were calculated. Each experiment was repeated six times.

### ***α-Glucosidase inhibitory activity***

*α*-Glucosidase (*Saccharomyces cerevisiae*) and 3, 5, di-nitro salicylic acid (DNS) were purchased from Sigma-Aldrich. *p*-nitro-phenyl-*α*-D-glucopyranoside (*p*-NPG), sodium carbonate, sodium dihydrogen phosphate and di-sodium hydrogen phosphate were purchased from Hi-Media.

The inhibitory activity of GDEE and the isolated compounds was carried out according to (Shai et al. 2011) with minor modification. Reaction mixture containing 50  $\mu$ l phosphate buffer (100 mM, pH=6.8), 10  $\mu$ l *α*-glucosidase and 20  $\mu$ l of varying concentrations of each sample (1000 to 7.81  $\mu$ g/mL) was preincubated for 15 min at 37 °C in a 96-Well plate. Then, 20  $\mu$ l P-NPG (5 mM) was added as a substrate and incubated further at 37 °C for 20 min. 50  $\mu$ l Na<sub>2</sub>CO<sub>3</sub> (0.1 M) were added to stop the reaction. The absorbance of the released *p*-nitrophenol was measured using Multiplate Reader at 405 nm. Acarbose at various concentrations (1000 to 7.81  $\mu$ g/mL) was included as a standard. Without test substance was set up in parallel as a control and each experiment was performed in six replicates. The results were expressed as inhibition percentage which was calculated as following:

$$\text{Inhibitory activity (\%)} = (1 - A_s/A_c) \times 100$$

A<sub>s</sub>: absorbance in the presence of tested sample

A<sub>c</sub>: absorbance of control.

### **Statistical analysis**

The data were analyzed using analysis of variance (Krasteva et al.). Determination of the significance of differences between means was done at  $p < 0.05$  using Duncan's multiple range tests.

### **Funding**

This research did not receive any specific grant from funding agencies in the public, commercial, or not-for-profit sectors.

### **Conflict of interest statement:**

The authors wish to declare that no conflicts of interest associated with this publication and there has been no financial support for this work.

**Table (S1): <sup>1</sup>H-NMR and <sup>13</sup>C-NMR spectroscopic data for compounds C1-C3**

| No.        | C1                     |                     | C2                           |                     | C3                           |                     |
|------------|------------------------|---------------------|------------------------------|---------------------|------------------------------|---------------------|
|            | $\delta_{\text{H}}$    | $\delta_{\text{C}}$ | $\delta_{\text{H}}$          | $\delta_{\text{C}}$ | $\delta_{\text{H}}$          | $\delta_{\text{C}}$ |
| <b>1</b>   |                        |                     |                              | 118.58              |                              |                     |
| <b>2</b>   |                        | <b>167.58</b>       | 7.33 (1H, d, $J=3.0$ )       | 115.11              |                              | 147.91              |
| <b>3</b>   | 6.63 (1H, s)           | 104.85              |                              | 148.45              |                              | 136.52              |
| <b>4</b>   |                        | <b>181.29</b>       |                              | 154.91              |                              | 176.58              |
| <b>5</b>   |                        | <b>160.29</b>       | 6.61 (1H, d, $J=8.6$ )       | 115.12              |                              | 161.37              |
| <b>6</b>   | 6.32 (1H, s)           | 99.11               | 6.73 (1H, dd, $J=3.0, 8.6$ ) | 119.79              | 6.19 (1H, d, $J=1.6$ )       | 98.51               |
| <b>7</b>   |                        | <b>164.32</b>       |                              | 165.34              |                              | 166.01              |
| <b>8</b>   |                        | 107.42              |                              |                     | 6.39 (1H, d, $J=1.6$ )       | 94.57               |
| <b>9</b>   |                        | <b>157.33</b>       |                              |                     |                              | 156.78              |
| <b>10</b>  |                        | 107.02              |                              |                     |                              | 104.01              |
| <b>1'</b>  |                        | 123.66              |                              |                     |                              | 123.15              |
| <b>2'</b>  | 7.94 (2H, d, $J=8.6$ ) | 129.61              |                              |                     | 7.64 (1H, d, $J=1.5$ )       | 116.23              |
| <b>3'</b>  | 6.91 (2H, d, $J=8.6$ ) | 118.64              |                              |                     |                              | 145.72              |
| <b>4'</b>  |                        | <b>161.58</b>       |                              |                     |                              | 148.11              |
| <b>5'</b>  | 6.91 (2H, d, $J=8.6$ ) | 118.64              |                              |                     | 6.89 (1H, d, $J=8.5$ )       | 116.57              |
| <b>6'</b>  | 7.94 (2H, d, $J=8.6$ ) | 129.61              |                              |                     | 7.75 (1H, dd, $J=1.5, 8.5$ ) | 122.41              |
| <b>1''</b> |                        | 75.43               |                              |                     |                              |                     |
| <b>2''</b> |                        | 71.07               |                              |                     |                              |                     |
| <b>3''</b> |                        | 79.32               |                              |                     |                              |                     |
| <b>4''</b> |                        | 71.50               |                              |                     |                              |                     |
| <b>5''</b> |                        | 81.54               |                              |                     |                              |                     |
| <b>6''</b> |                        | 61.44               |                              |                     |                              |                     |

**Table (S2): HPLC-MS/MS detected secondary metabolites in *G. decandrus* aerial parts**

| Pk. no. | R <sub>t</sub> (min) | [M-H] <sup>+</sup> | Fragment ions                                 | Tentatively identified compounds                                                                                               | Class              |
|---------|----------------------|--------------------|-----------------------------------------------|--------------------------------------------------------------------------------------------------------------------------------|--------------------|
| 1       | 2.44                 | 289.02             | 271, 247, 245, 205, 179                       | (epi)catechin                                                                                                                  | fla-3-ol           |
| 2       | 2.78                 | 783.34             | 741, 723, 633, 591, <b>315</b>                | isorhamnetin acetyl- <i>O</i> -dipentosyl- <i>O</i> -hexoside                                                                  | fl- <i>O</i> -gly. |
| 3       | 3.06                 | 637.26             | 595, 577, 463, <b>301</b>                     | quercetin -acetyl- <i>O</i> -pentosyl - <i>O</i> - hexoside.                                                                   | fl- <i>O</i> -gly. |
| 4       | 3.41                 | 609.40             | 591, 477, <b>315</b>                          | isorhamnetin- <i>O</i> - pentosyl- <i>O</i> - hexoside                                                                         | fl- <i>O</i> -gly. |
| 5       | 3.53                 | 1221.53            | 1203, 1089, 957, 811, 679, <b>503</b>         | tetrahydroxyoleanen- <i>O</i> -dipentosyl- <i>O</i> -rhamnosyl- <i>O</i> -pentosyl- <i>O</i> -hexuronide                       | tr. sap.           |
| 6       | 4.00                 | 1235.65            | 1219, 1089, 957, 679, <b>503</b>              | tetrahydroxyoleanen <i>O</i> - rhamnosyl- <i>O</i> -pentosyl- <i>O</i> - rhamnosyl- <i>O</i> - pentosyl- <i>O</i> - hexuronide | tr. sap.           |
| 7       | 4.12                 | 651.23             | 609, 591, 477, <b>315</b>                     | isorhamnetin -acetyl- <i>O</i> -pentosyl - <i>O</i> -hexoside                                                                  | fl- <i>O</i> -gly. |
| 8       | 4.99                 | 735.29             | 693, 651, 609, 591, 477, <b>315</b>           | isorhamnetin -triacetyl- <i>O</i> -pentosyl- <i>O</i> -hexoside                                                                | fl- <i>O</i> -gly. |
| 9       | 5.17                 | 825.27             | 783, 765, 741, 723, 693, 675, 609, <b>315</b> | isorhamnetin-diacetyl-di- <i>O</i> -pentosyl- <i>O</i> -hexoside                                                               | fl- <i>O</i> -gly. |
| 10      | 5.31                 | 1263.50            | 1131, 721, 679, <b>503</b>                    | tetrahydroxyoleanen acetyl-tri- <i>O</i> -pentosyl- <i>O</i> -rhamnosyl- <i>O</i> -hexuronide                                  | tr. sap.           |
| 11      | 5.49                 | 187.20             | 187, 169, 125                                 | hydroxygallic acid                                                                                                             | ph. acid           |
| 12      | 5.70                 | 1219.60            | 1201, 941, 663, <b>487</b>                    | trihydroxyoleanen di- <i>O</i> - pentosyl- di- <i>O</i> -rhamnosyl- <i>O</i> - hexuronide                                      | tr. sap.           |
| 13      | 5.79                 | 679.19             | 637, 619, 595, 463, <b>301</b>                | quercetin diacetyl- <i>O</i> -pentosyl- <i>O</i> -hexoside                                                                     | fl- <i>O</i> -gly. |
| 14      | 6.07                 | 1219.42            | 1087, 955, 809, 663, <b>487</b>               | trihydroxyoleanen di- <i>O</i> -pentosyl, di- <i>O</i> -rhamnosyl- <i>O</i> - hexuronide                                       | tr. sap.           |
| 15      | 7.24                 | 693.26             | 633, 609, 591, 477, <b>315</b> , 271          | isorhamnetin diacetyl - <i>O</i> -pentosyl, <i>O</i> -hexoside                                                                 | fl- <i>O</i> -gly. |
| 16      | 7.37                 | 431.15             | 413, 341, 311, 285, 269                       | (iso) vitexin                                                                                                                  | fl- <i>C</i> -gly. |
| 17      | 10.14                | 721.17             | 702, 679, 637, 631, 595, 463, <b>301</b>      | quercetin triacetyl <i>O</i> -pentosyl- <i>O</i> -hexoside                                                                     | fl- <i>O</i> -gly. |
| 18      | 19.73                | 299.17             | 299, 284, 271, 255, 243                       | gliricidin/ methylorobol                                                                                                       | iso.agly.          |
| 19      | 25.82                | 283.02             | 283, 268, 255, 239, 227, 220                  | Calycosin                                                                                                                      | iso.agly.          |

fla-3-ol: flavan-3-ol; fl-*C*-gly.: flavone-*C*-glycoside; fl-*O*-gly.: flavonol-*O*-glycoside; iso. agly.: isoflavonoid aglycone; ph. acid.: phenolic acid; Pk.: peak; tr. sap.: triterpenoidal saponin



**Table (S3): Cytotoxicity effect of *G. decandrus* Forssk. and its isolated compounds on Vero cells**

|             | Conc.<br>( $\mu\text{g/mL}$ ) | O.D* $\pm$ S.E | Toxicity % | CC <sub>50</sub> $\mu\text{g/mL}$ |
|-------------|-------------------------------|----------------|------------|-----------------------------------|
| <b>Vero</b> |                               | 0.25           | 0.0056     | 0                                 |
| <b>GDEE</b> | 10000                         | 0.01           | 0.0010     | 95.56                             |
|             | 5000                          | 0.01           | 0.0009     | 94.49                             |
|             | 2500                          | 0.02           | 0.0009     | 90.19                             |
|             | 1250                          | 0.04           | 0.0048     | 83.33                             |
|             | 625                           | 0.07           | 0.0081     | 70.16                             |
|             | 313                           | 0.15           | 0.0023     | 40.99                             |
|             | 156.25                        | 0.21           | 0.0009     | 13.58                             |
|             | 78.12**                       | 0.25           | 0.0023     | 0.27                              |
| <b>C1</b>   | 1000                          | 0.01           | 0.0015     | 95.83                             |
|             | 500                           | 0.01           | 0.0006     | 94.35                             |
|             | 250                           | 0.01           | 0.0009     | 94.22                             |
|             | 125                           | 0.02           | 0.0012     | 92.74                             |
|             | 62.5                          | 0.03           | 0.0053     | 89.52                             |
|             | 31.25                         | 0.07           | 0.0058     | 70.83                             |
|             | 15.63                         | 0.14           | 0.0041     | 45.43                             |
|             | 7.81**                        | 0.24           | 0.0015     | 2.55                              |
| <b>C2</b>   | 1000                          | 0.01           | 0.0007     | 95.7                              |
|             | 500                           | 0.01           | 0.0012     | 95.97                             |
|             | 250                           | 0.01           | 0.0012     | 94.49                             |
|             | 125                           | 0.02           | 0.0012     | 93.15                             |
|             | 62.5                          | 0.03           | 0.0028     | 88.58                             |
|             | 31.25                         | 0.08           | 0.0015     | 67.88                             |
|             | 15.63                         | 0.16           | 0.0030     | 36.96                             |
|             | 7.81**                        | 0.24           | 0.0044     | 2.55                              |
| <b>C3</b>   | 1000                          | 0.01           | 0.0006     | 96.37                             |
|             | 500                           | 0.01           | 0.0018     | 95.3                              |
|             | 250                           | 0.01           | 0.0009     | 94.22                             |
|             | 125                           | 0.02           | 0.0034     | 91.8                              |
|             | 62.5                          | 0.03           | 0.0028     | 87.23                             |
|             | 31.25                         | 0.09           | 0.0012     | 65.05                             |
|             | 15.63                         | 0.15           | 0.0066     | 41.4                              |
|             | 7.81**                        | 0.25           | 0.0021     | 0                                 |

\* Mean of six determinations; \*\*: maximum nontoxic concentration (MNTC); C1: vitexin; C2: protocatechuic acid; C3: quercetin; CC<sub>50</sub>, concentration that kill 50% of Vero cells, conc., concentrations; S.E., standard error; O.D., optical density; GDEE: *G. decandrus* ethanol extract.

**Table (S4): Inhibitory effect of GDEE and C1-3 on  $\alpha$ -glucosidase enzyme.**

| Conc.                  | Acarbose         | GDEE       | C1         | C2         | C3         |       |
|------------------------|------------------|------------|------------|------------|------------|-------|
| 1000                   | 90.10±0.58       | 53.24±1.5  | 59.31±1.5  | 67.32±1.2  | 72.65±1.5  |       |
| 500                    | 86.34±1.2        | 47.15±1.3  | 53.01±2.1  | 60.48±2.5  | 68.28±0.92 |       |
| 250                    | 71.34±1.5        | 29.18±2.1  | 49.37±0.58 | 54.18±0.58 | 61.08±1.5  |       |
| 125                    | 63.42±2.1        | 12.34±0.58 | 41.32±0.92 | 51.32±1.6  | 56.85±1.6  |       |
| 62.5                   | 60.14±0.72       | 0          | 37.25±0.63 | 39.24±0.58 | 49.18±0.63 |       |
| 31.25                  | 50.31±1.5        | 0          | 29.32±2.1  | 25.73±1.5  | 31.25±0.58 |       |
| 15.63                  | 43.28±1.2        | 0          | 17.16±1.3  | 10.34±0.92 | 18.68±1.5  |       |
| 7.81                   | 32.15±0.58       | 0          | 6.28±1.6   | 0          | 8.32±2.1   |       |
| <b>IC<sub>50</sub></b> | $\mu\text{g/mL}$ | 30.57      | 733.90     | 293.30     | 118.17     | 69.18 |
|                        | mM               |            |            | 0.678      | 0.767      | 0.229 |

C1: vitexin; C2: protocatechuic acid; C3: quercetin

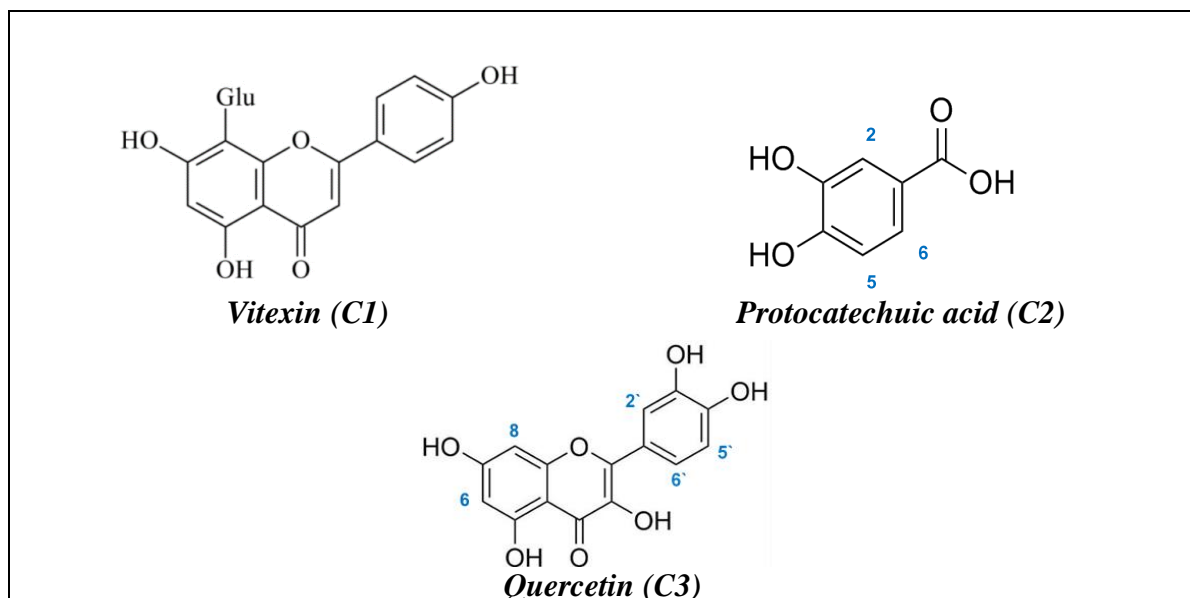

**Fig. (S1): Structures of *G. decandrus* Forssk. aerial parts isolated compounds**

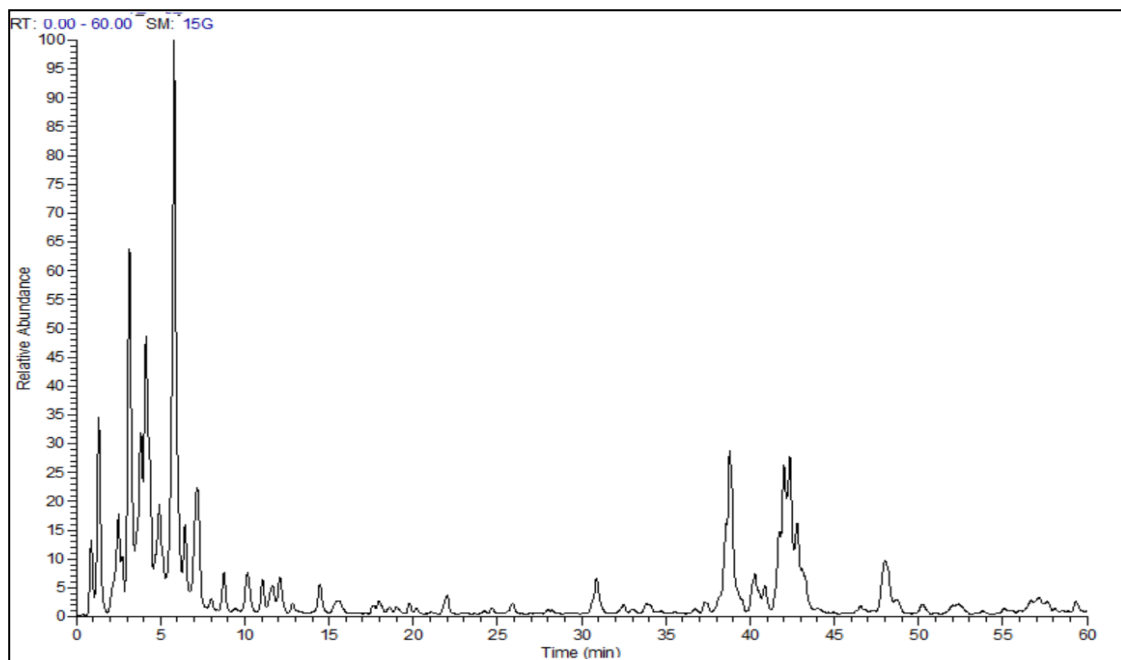

**Fig. (S2): LC base peak chromatogram of ethanol extract of *G. decandrus* Forsk. aerial parts**

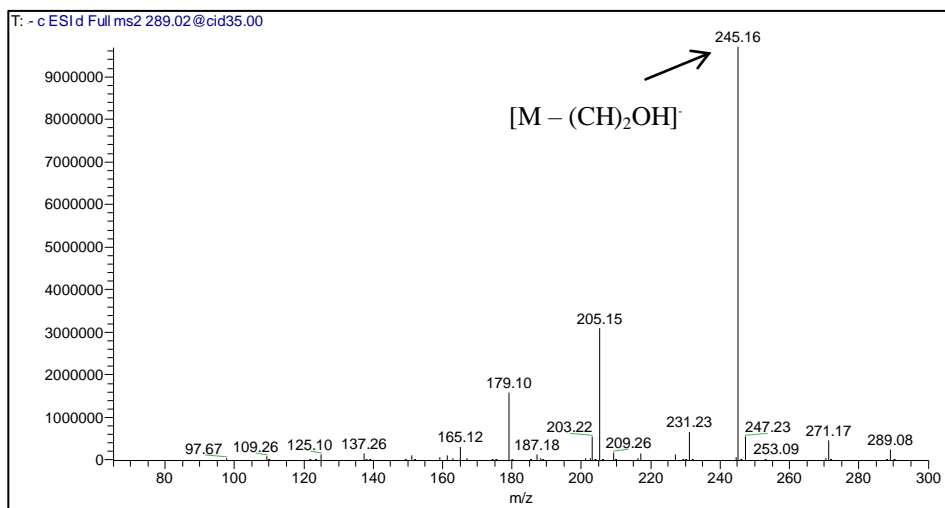

**Fig. (S3): MS/MS chromatogram of peak 1**

Pk.1 was the only identified flavan-3-ol. Fragment ions at  $m/z$  245, 205, and 179 characteristic for catechin were observed (Sobeh et al. 2018).

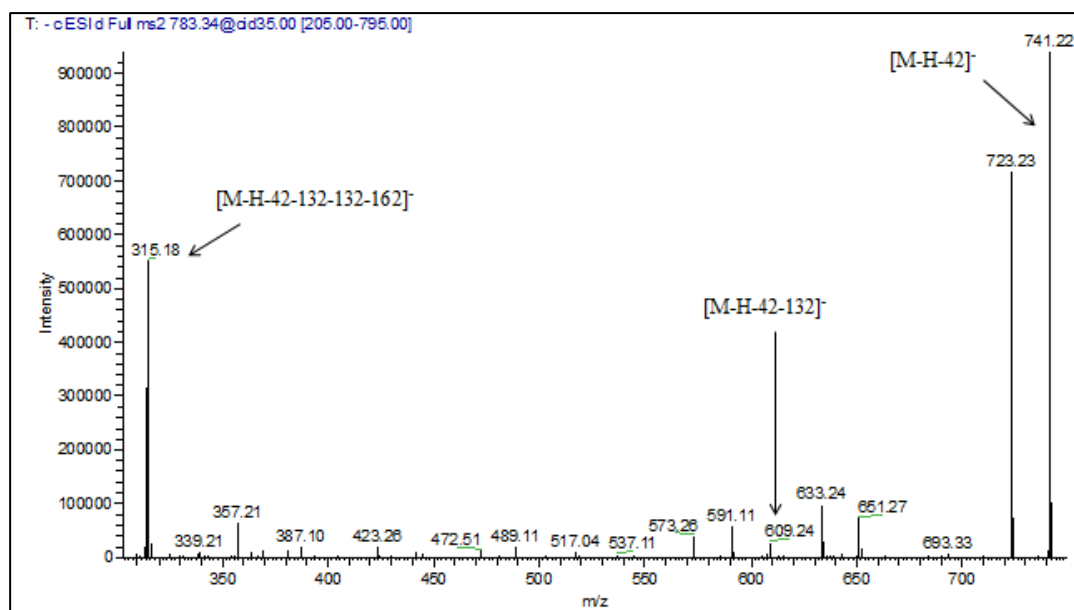

**Fig. (S4): MS/MS chromatogram of peak 2**

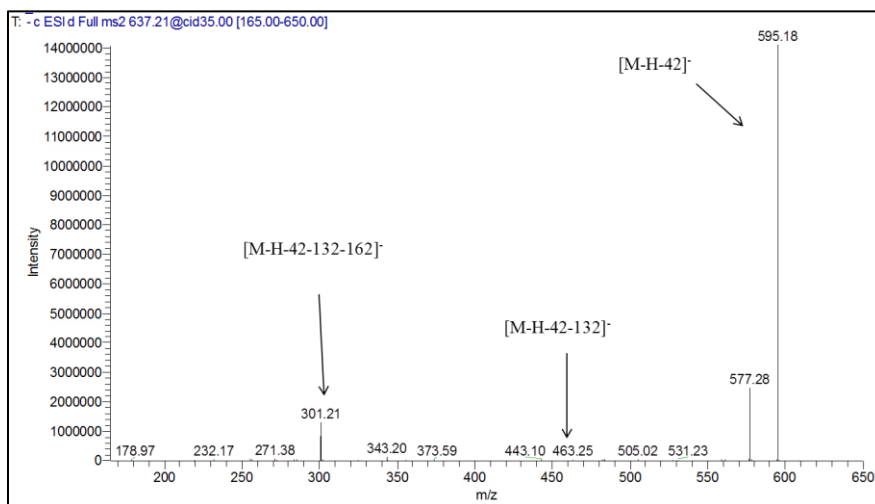

**Fig. (S5): MS/MS chromatogram of peak 3**

Pk. 3 showed  $[M-H]^-$  at  $m/z$  637.26 yielded upon fragmentation daughter ions at  $m/z$  595  $[M-H-42]^-$ , 463  $[M-H-132]^-$ , and 301  $[M-H-162]^-$  due to loss of acetyl, pentose, and hexose moieties respectively. It was tentatively identified as quercetin acetyl-*O*-pentosyl-*O*-hexoside. Pks. 13 and 17 with  $[M-H]^-$  at  $m/z$  679.19 and 721.17 showed molecular weight higher than pk. 3 by 42 and 42x2 Da which in turn means extra acetyl groups. The fragmentation pattern of these two pks. 13 and 17 showed fragments at  $m/z$  679 and 637 due to loss of 2 acetyl moieties (2x42 amu) in addition to same fragments observed in pk. 3 (at  $m/z$  595, 463 and 301) which confirmed their identification as acetyl derivatives of pk. 3 (Cuyckens and Claeys 2004; Bechlem et al. 2017)

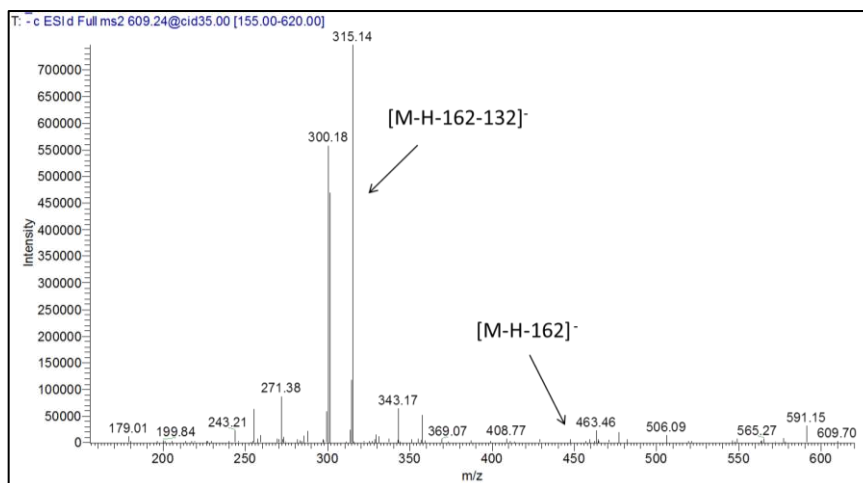

**Fig. (S6): MS/MS chromatogram of peak 4**

Pk. 4 was characterized by  $[M-H]^-$  at  $m/z$  609.40 and upon fragmentation produced daughter ion at  $m/z$  477  $[M-H-132]^-$  due to loss of pentose moiety, as well as  $m/z$  315  $[M-H-132-162]^-$  due to loss of pentose and hexose moieties. It was tentatively identified as isorhamnetin-*O*-pentosyl-*O*-hexoside (Bechlem et al. 2017). Pks. 2 and 9  $[M-H]^-$  at  $m/z$  783.34, and 825.27 respectively showed molecular weight exceeds that of pk.4 by 132+42 and 132+(42x2) which in turns indicated acetylated derivatives of isorhamnetin-*O*-dipentosyl-*O*-hexoside (Bechlem et al. 2017).

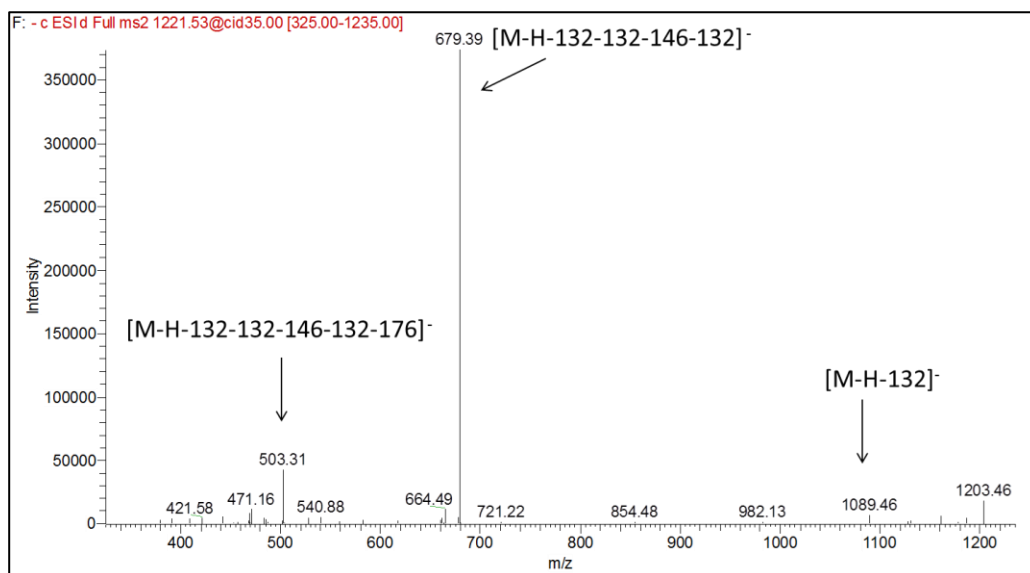

**Fig. (S7): MS/MS chromatogram of peak 5**

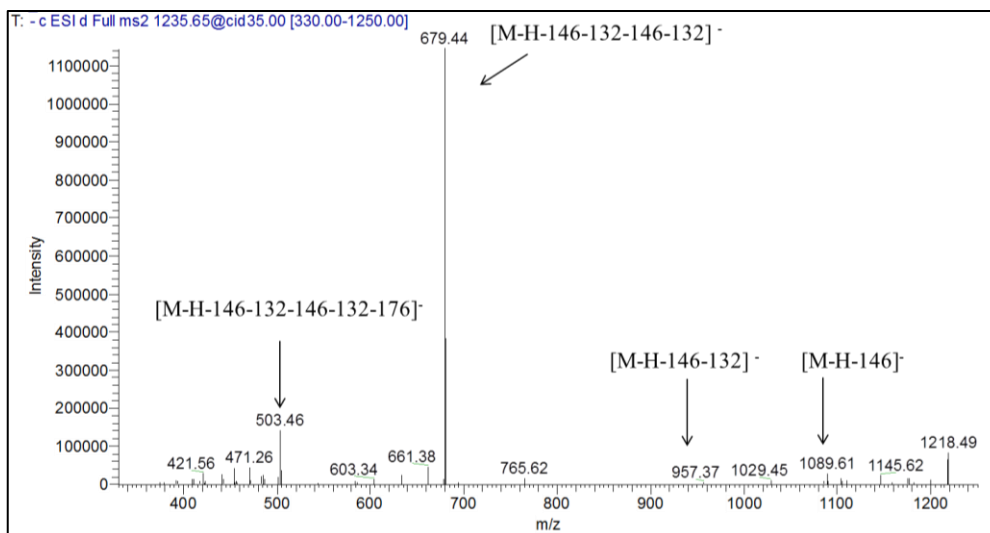

**Fig. (S8): MS/MS chromatogram of peak 6**

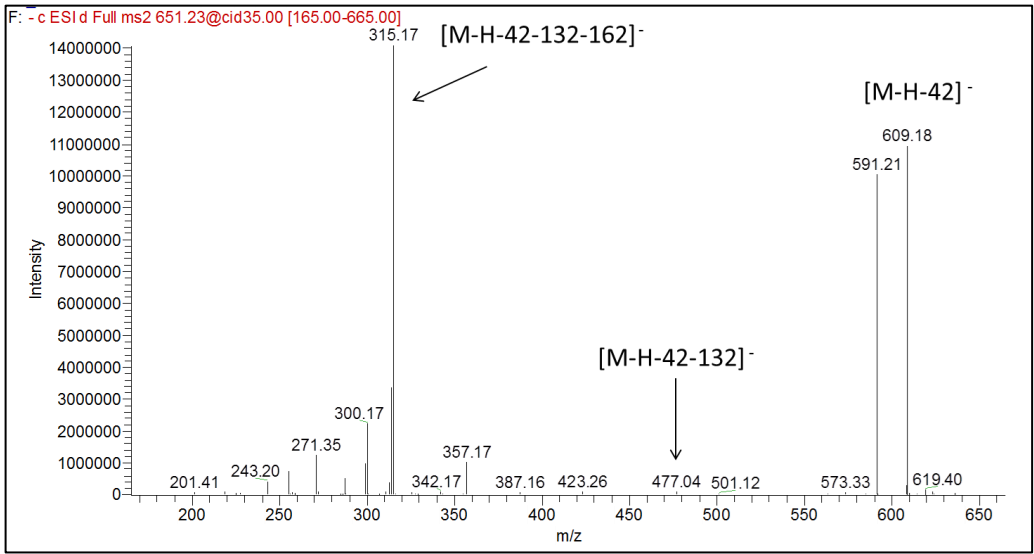

**Fig. (S9): MS/MS chromatogram of peak 7**

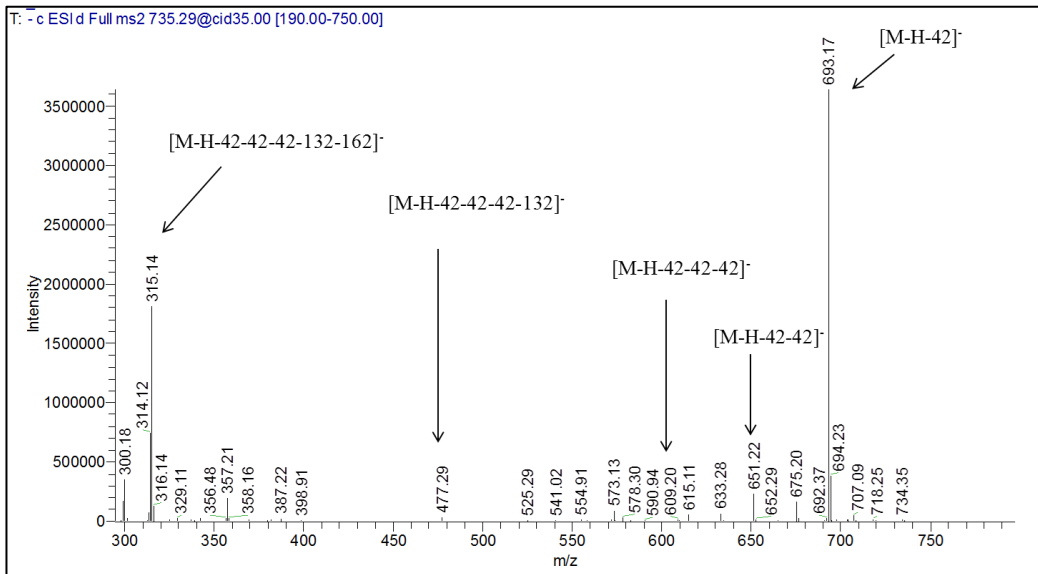

**Fig. (S10): MS/MS chromatogram of peak 8**

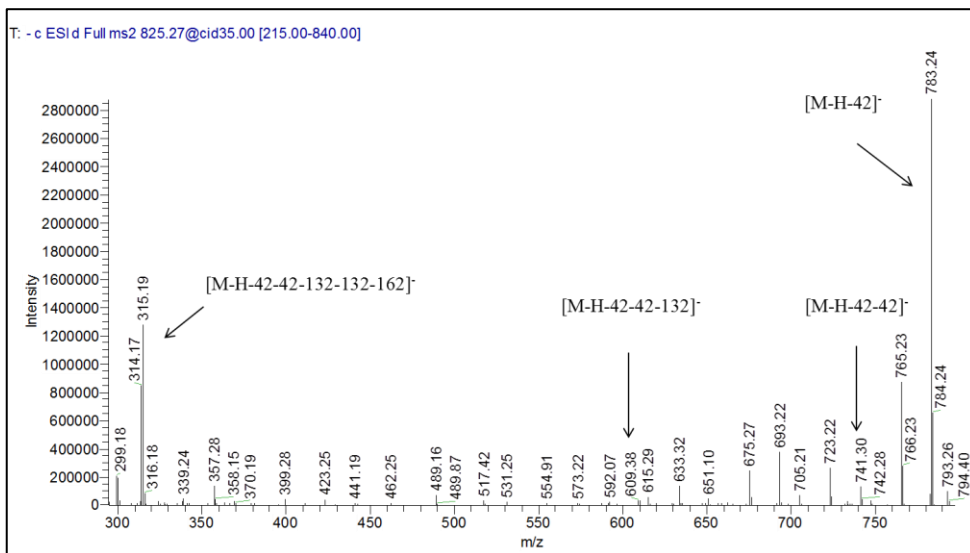

**Fig. (S11): MS/MS chromatogram of peak 9**

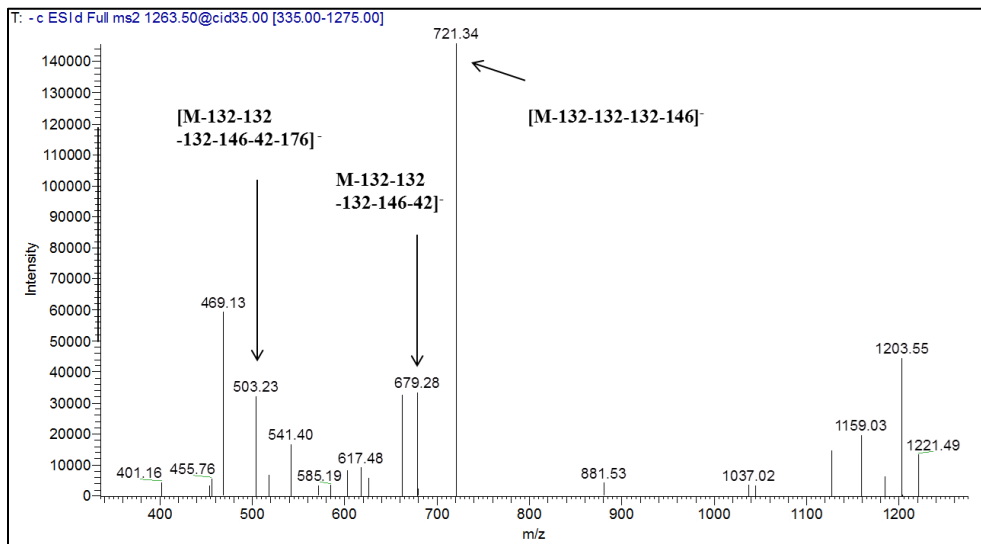

**Fig. (S12): MS/MS chromatogram of peak 10**



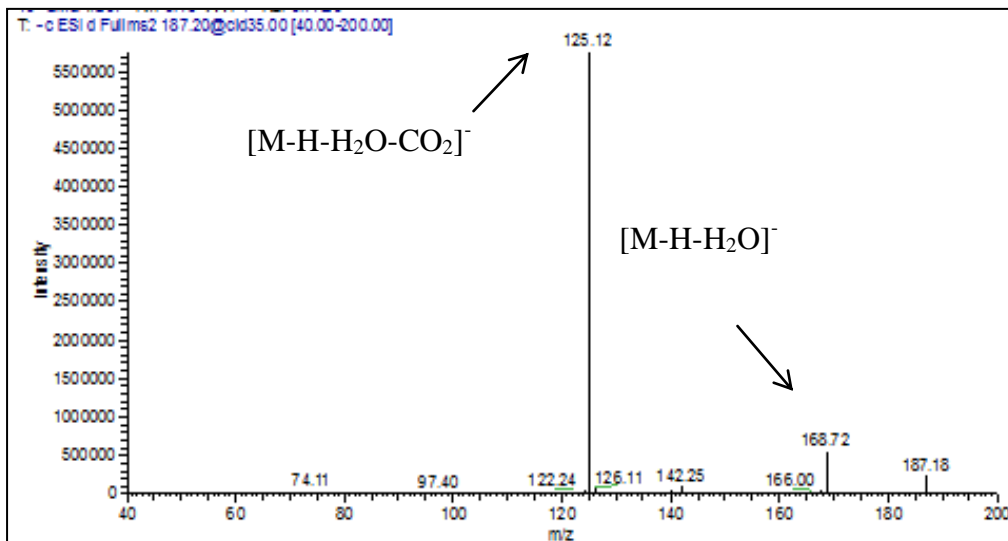

**Fig. (S13): MS/MS chromatogram of peak 11**

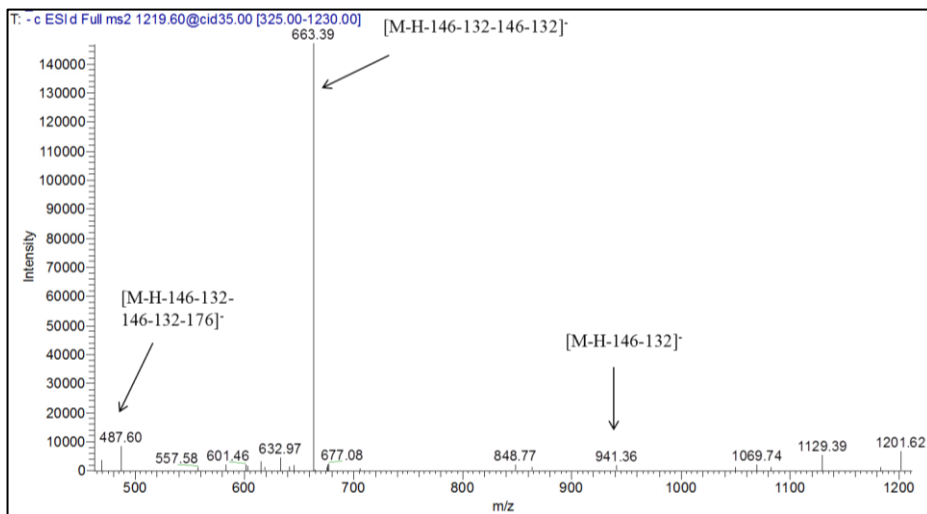

**Fig. (S14): MS/MS chromatogram of peak 12**

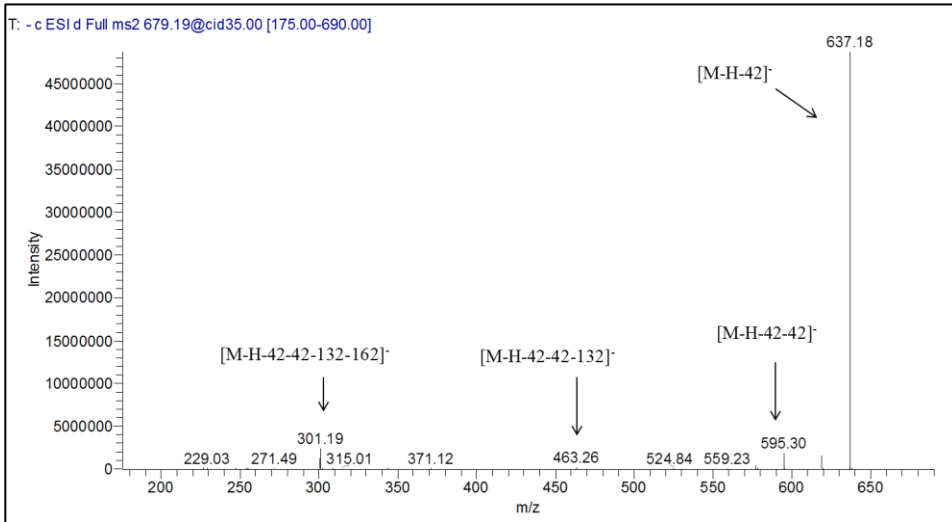

**Fig. (S15): MS/MS chromatogram of peak 13**

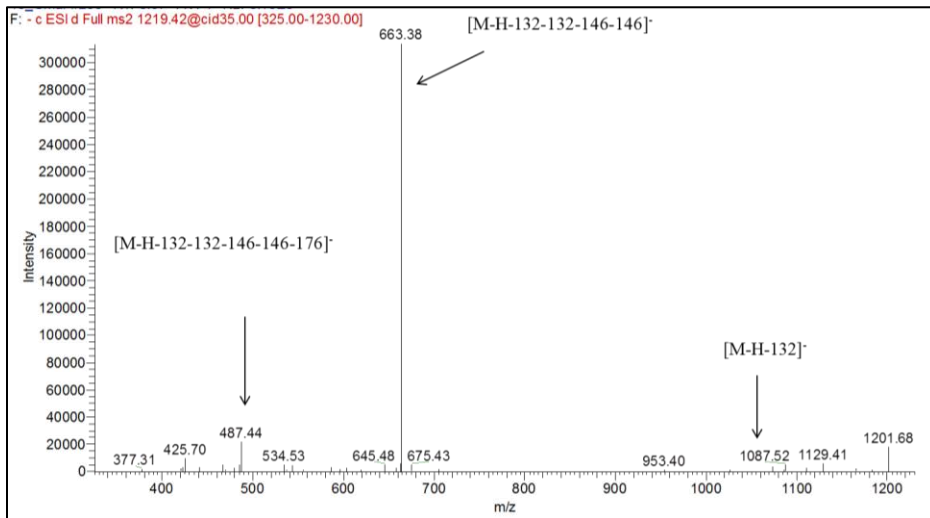

**Fig. (S16): MS/MS chromatogram of Peak 14**

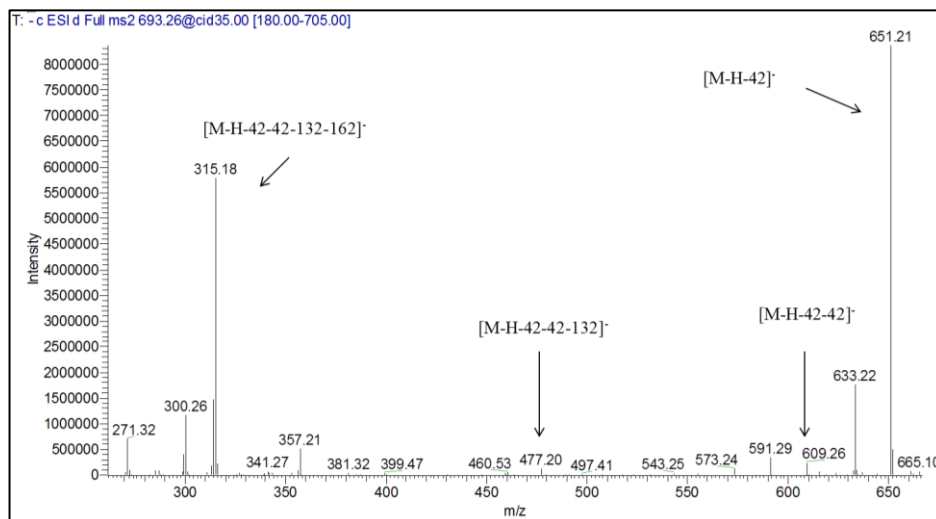

**Fig. (S17): MS/MS chromatogram of peak 15**

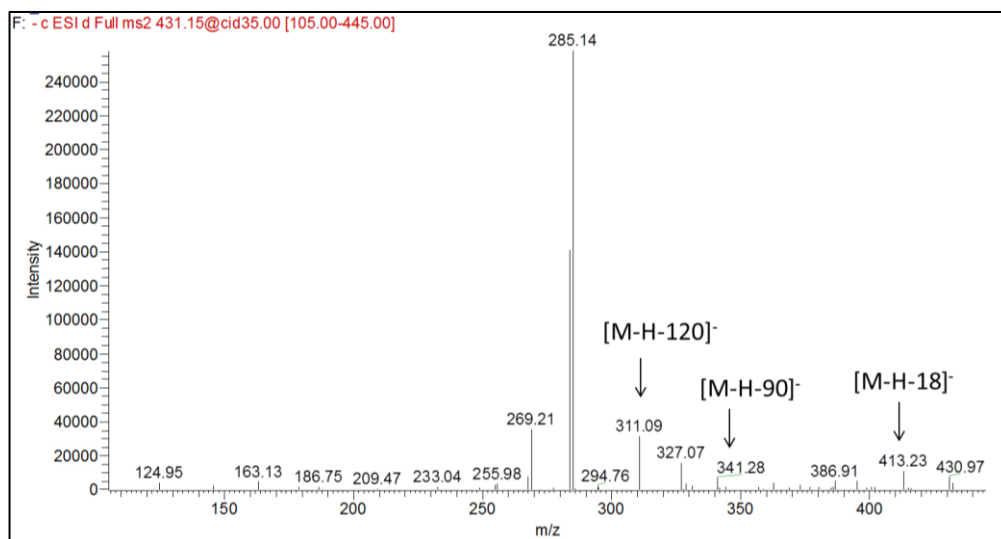

**Fig. (S18): MS/MS chromatogram of peak 16**

Pk. 16, the only detected flavone glycoside, [M-H]<sup>-</sup> at  $m/z$  431.15 showed fragment ions at  $m/z$  413 [M-H-18]<sup>-</sup>, 341 [M-H-90]<sup>-</sup>, 311 [M-H-120]<sup>-</sup>. This loss of 90 and 120 Da indicating C-glycoside, as well as, fragment at  $m/z$  269 Da corresponding to apigenin aglycone (Ibrahim et al. 2015; Ferreres et al. 2007). It was tentatively identified as (iso) vitexin.

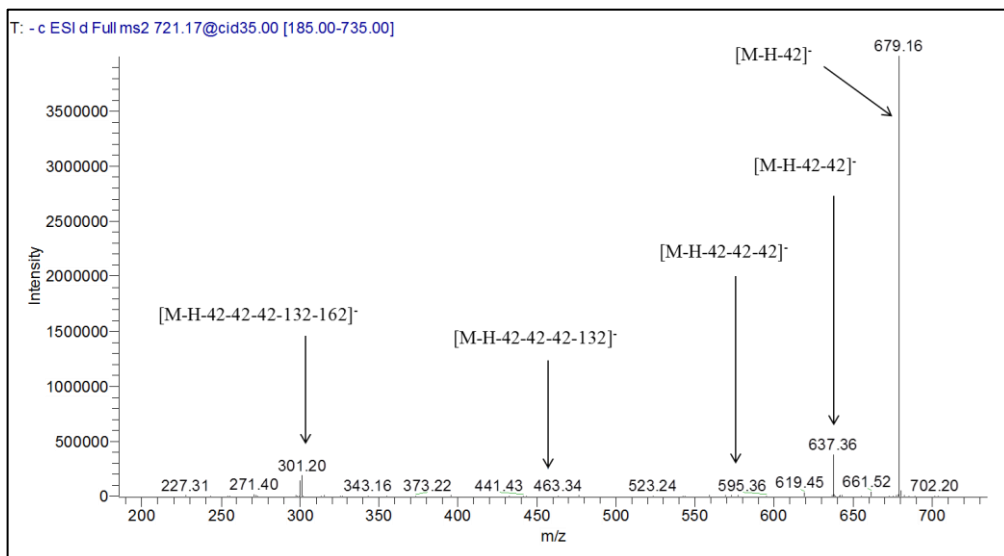

**Fig. (S19): MS/MS chromatogram of peak 17**

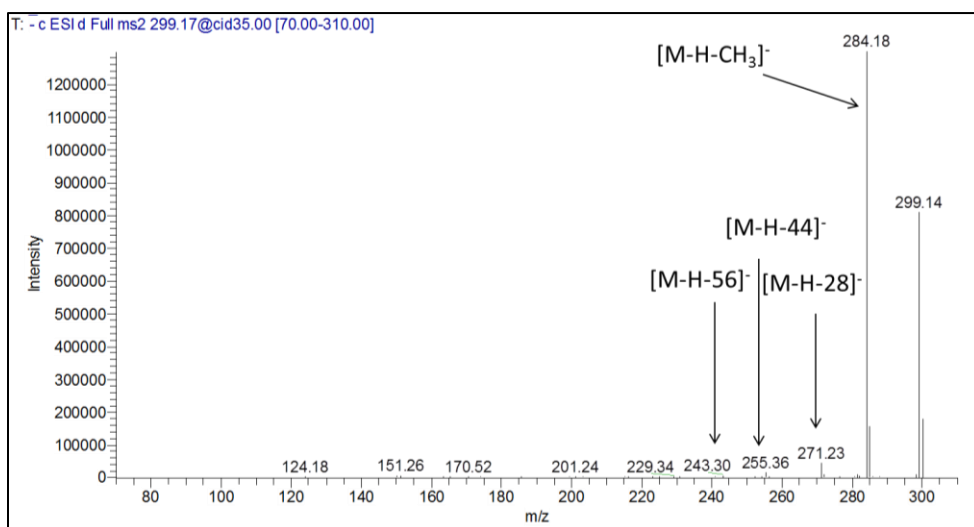

**Fig. (S20): MS/MS chromatogram of peak 18**

Isoflavones gave a series of regular neutral losses of 28 Da, 44 Da, 56 Da, which could be attributed to CO, CO<sub>2</sub> and 2CO respectively (Ye et al. 2012). MS/MS spectra of pks. 18 and 19 showed fragments corresponding to [M-H-CO]<sup>-</sup>, [M-H-CO<sub>2</sub>]<sup>-</sup>, and [M-H-2CO]<sup>-</sup> at *m/z* 271, 255, 243 and 255, 239, 227 respectively. Additionally, their MS/MS spectra showed base peaks at *m/z* 299 and 268 [M-H-CH<sub>3</sub>]<sup>-</sup>, suggesting the presence of a methoxy group. Pks. 18 and 19 were tentatively identified as gliricidin/methylorobol and calycosin respectively (Ye et al. 2012).

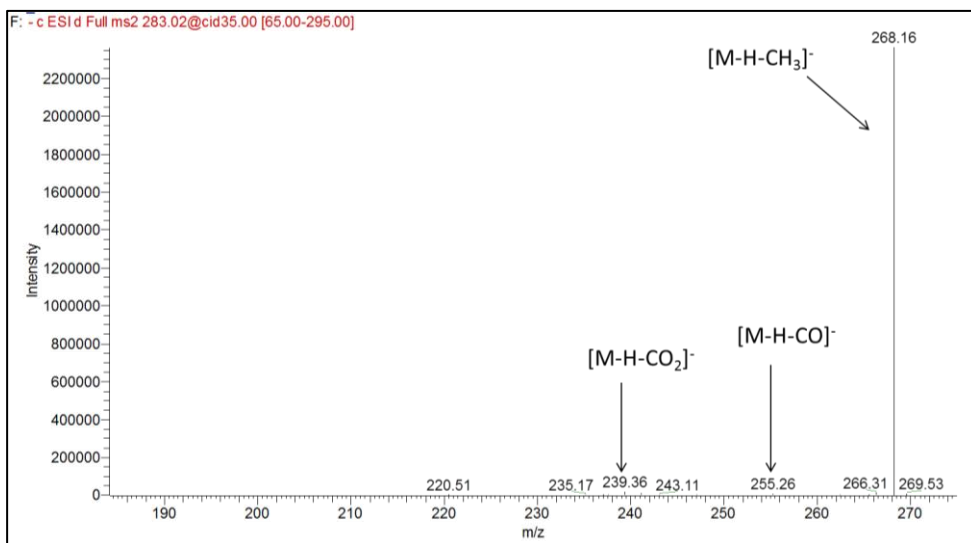

**Fig. (S21): MS/MS chromatogram of peak 19**

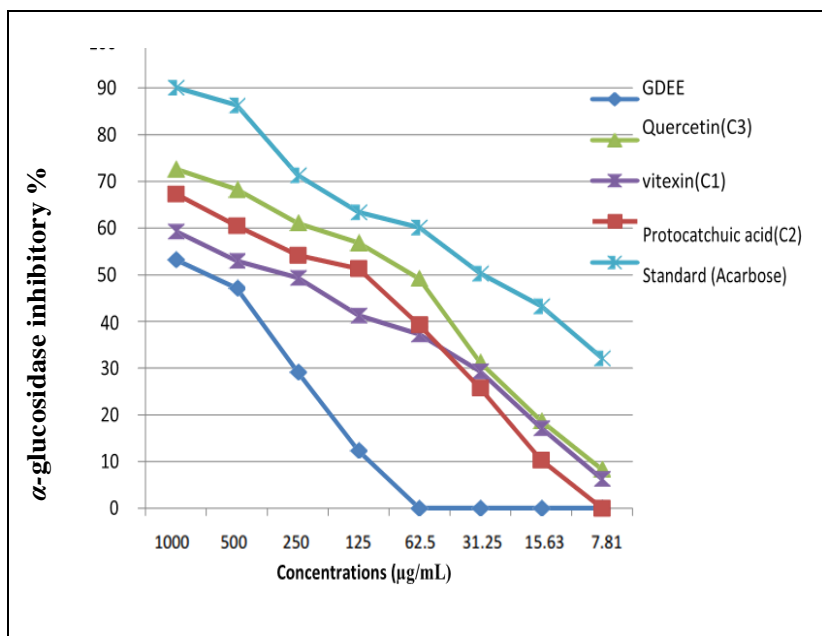

**Fig. (S22): Inhibitory effect of GDEE and the isolated compounds on  $\alpha$ -glucosidase enzyme**

## REFERENCE

- Ashour, Rehab MS, Mona M Okba, Esther T Menze, and Rania A El Gedaily. 2019. 'Eucalyptus Sideroxylon Bark Anti-inflammatory Potential, Its UPLC-PDA-ESI-qTOF-MS Profiling, and Isolation of a New Phloroglucinol', *Journal of chromatographic science*, 57: 565-74.
- Bechlem, Houria, Teresa Mencherini, Mohamed Bouheroum, Samir Benayache, Roberta Cotugno, Alessandra Braca, and Nunziatina De Tommasi. 2017. 'New constituents from *Gymnocarpos decander*', *Planta medica*, 83: 1200-06.
- Cuyckens, Filip, and Magda Claeys. 2004. 'Mass spectrometry in the structural analysis of flavonoids', *Journal of Mass spectrometry*, 39: 1-15.
- Elaissi, Ameer, Zyed Rouis, Nabil Abid Ben Salem, Samia Mabrouk, Youssef ben Salem, Karima Bel Haj Salah, Mahjoub Aouni, Farhat Farhat, Rachid Chemli, and Fethia Harzallah-Skhiri. 2012. 'Chemical composition of 8 eucalyptus species' essential oils and the evaluation of their antibacterial, antifungal and antiviral activities', *BMC complementary and alternative medicine*, 12: 81.
- Ferreres, Federico, Angel Gil-Izquierdo, Paula B Andrade, Patricia Valentão, and FA Tomás-Barberán. 2007. 'Characterization of C-glycosyl flavones O-glycosylated by liquid chromatography–tandem mass spectrometry', *Journal of Chromatography A*, 1161: 214-23.
- Gescher, Kirsten, Joachim Kühn, Wali Hafezi, Andreas Louis, Andrea Derksen, Alexandra Deters, Eva Lorentzen, and Andreas Hensel. 2011. 'Inhibition of viral adsorption and penetration by an aqueous extract from *Rhododendron ferrugineum* L. as antiviral principle against herpes simplex virus type-1', *Fitoterapia*, 82: 408-13.
- Gong, Edwin Yunhao. 2013. *Antiviral methods and protocols* (Springer).
- Goodger, Jason QD, and Ian E Woodrow. 2011. ' $\alpha$ ,  $\beta$ -Unsaturated monoterpene acid glucose esters: structural diversity, bioactivities and functional roles', *Phytochemistry*, 72: 2259-66.
- Ibrahim, Rana M, Ali M El-Halawany, Dalia O Saleh, El Moataz Bellah El Naggar, Abd El-Rahman O El-Shabrawy, and Seham S El-Hawary. 2015. 'HPLC-DAD-MS/MS profiling of phenolics from *Securigera securidaca* flowers and its anti-hyperglycemic and anti-hyperlipidemic activities', *Revista Brasileira de Farmacognosia*, 25: 134-41.
- Krasteva, Iliana N, Ivo S Popov, Vessela I Balabanova, Stefan D Nikolov, and Ivanka P Pencheva. 2008. 'Phytochemical study of *Gypsophila trichotoma* wend.(Caryophyllaceae)', *Quimica Nova*, 31: 1125-26.
- Ocazonez, Raquel Elvira, Rocio Meneses, Flor Ángela Torres, and Elena Stashenko. 2010. 'Virucidal activity of Colombian *Lippia* essential oils on dengue virus replication in vitro', *Memórias do Instituto Oswaldo Cruz*, 105: 304-09.
- Okba, Mona M, Rania A El Gedaily, and Rehab M Ashour. 2017. 'UPLC–PDA–ESI–qTOF-MS profiling and potent anti-HSV-II activity of *Eucalyptus sideroxylon* leaves', *Journal of Chromatography B*, 1068: 335-42.

- Scazzocchio, Beatrice, Rosaria Vari, Carmelina Filesi, Massimo D'Archivio, Carmela Santangelo, Claudio Giovannini, Annunziata Iacovelli, Gianfranco Silecchia, Giovanni Li Volti, Fabio Galvano, and Roberta Masella. 2011. 'Cyanidin-3-O- $\beta$ -glucoside and protocatechuic acid exert insulin-like effects by upregulating PPAR $\gamma$  activity in human omental adipocytes', *Diabetes*, 60: 2234-44.
- Shai, LJ, SR Magano, SL Lebelo, and AM Mogale. 2011. 'Inhibitory effects of five medicinal plants on rat alpha-glucosidase: Comparison with their effects on yeast alpha-glucosidase', *Journal of Medicinal Plants Research*, 5: 2863-67.
- Sharma, Monica, Rajat Sandhir, Anuradha Singh, Pankaj Kumar, Ankita Mishra, Sanjay Jachak, Sukhvinder P. Singh, Jagdeep Singh, and Joy Roy. 2016. 'Comparative Analysis of Phenolic Compound Characterization and Their Biosynthesis Genes between Two Diverse Bread Wheat (*Triticum aestivum*) Varieties Differing for Chapatti (Unleavened Flat Bread) Quality', *Frontiers in plant science*, 7: 1870-70.
- Sobeh, Mansour, Mona F Mahmoud, Rehab A Hasan, Mohamed AO Abdelfattah, Omar M Sabry, Mosad A Ghareeb, Assem M El-Shazly, and Michael Wink. 2018. 'Tannin-rich extracts from *Lannea stuhlmannii* and *Lannea humilis* (Anacardiaceae) exhibit hepatoprotective activities in vivo via enhancement of the anti-apoptotic protein Bcl-2', *Scientific reports*, 8: 9343.
- Takeuchi, Hitoshi, Masanori Baba, and Shiro Shigeta. 1991. 'An application of tetrazolium (MTT) colorimetric assay for the screening of anti-herpes simplex virus compounds', *Journal of virological methods*, 33: 61-71.
- Ye, Min, Wen-Zhi Yang, Ke-Di Liu, Xue Qiao, Bei-Jia Li, Jun Cheng, Jie Feng, De-An Guo, and Yu-Ying Zhao. 2012. 'Characterization of flavonoids in *Millettia nitida* var. *hirsutissima* by HPLC/DAD/ESI-MS<sup>n</sup>', *Journal of pharmaceutical analysis*, 2: 35-42.
